# Supplementary material for: Metal–support interactions in metal oxide-supported atomic, cluster, and nanoparticle catalysis
Source: Royal Society of Chemistry journal article supplement (doi:10.1039/d4cs00527a), 2024-01-01
Supplement: d4cs00527a1.pdf [file d4cs00527a1.pdf]

## Supplementary information

### **Metal Support Interactions in Metal Oxide-Supported Atomic, Cluster, and Nanoparticle Catalysis**

Denis Leybo<sup>†1</sup>, Ubong J. Etim<sup>†2</sup>, Matteo Monai<sup>3</sup>, Simon R. Bare<sup>\*4,5</sup>, Ziyi Zhong<sup>\*2</sup>, Charlotte Vogt<sup>\*1</sup>

<sup>1</sup> Schulich Faculty of Chemistry, and Resnick Sustainability Center for Catalysis, Technion, Israel Institute of Technology, Technion City, Haifa 32000, Israel

<sup>2</sup> Department of Chemical Engineering and Guangdong Provincial Key Laboratory of Materials and Technologies for Energy Conversion (MATEC), Guangdong Technion Israel Institute of Technology (GTIIT), 241 Daxue Road, Shantou, 515063, China

<sup>3</sup> Inorganic Chemistry and Catalysis group, Institute for Sustainable and Circular Chemistry, Utrecht University, Universiteitsweg 99, 3584 CG Utrecht, The Netherlands.

<sup>4</sup> Stanford Synchrotron Radiation Lightsource, SLAC National Accelerator Laboratory, 2575 Sand Hill Road, Menlo Park, CA 94025, USA

<sup>5</sup> SUNCAT Center for Interface Science and Catalysis, SLAC National Accelerator Laboratory, Menlo Park, CA 94025, USA

\* Corresponding author

† These authors contributed equally to this work.

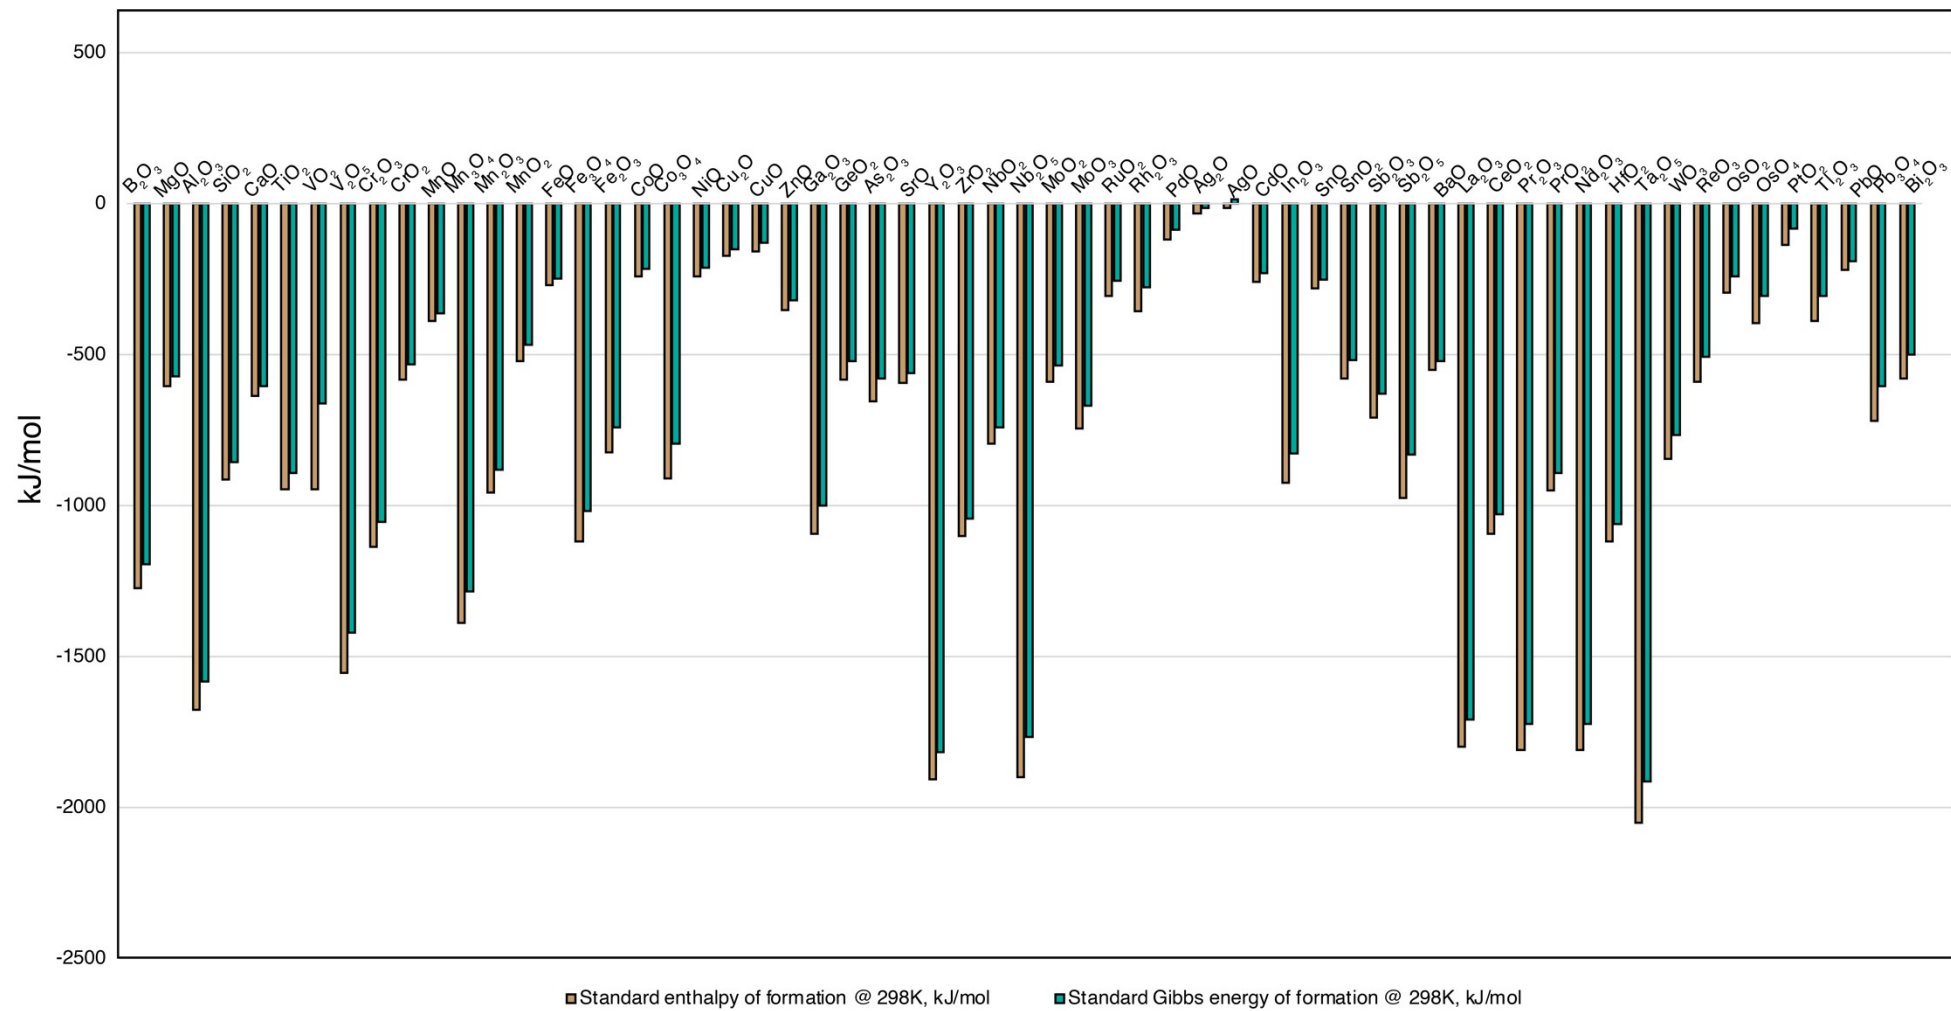

**Figure S1.** Standard enthalpy of formation and standard Gibbs energy of formation of selected binary oxides in kJ/mol.

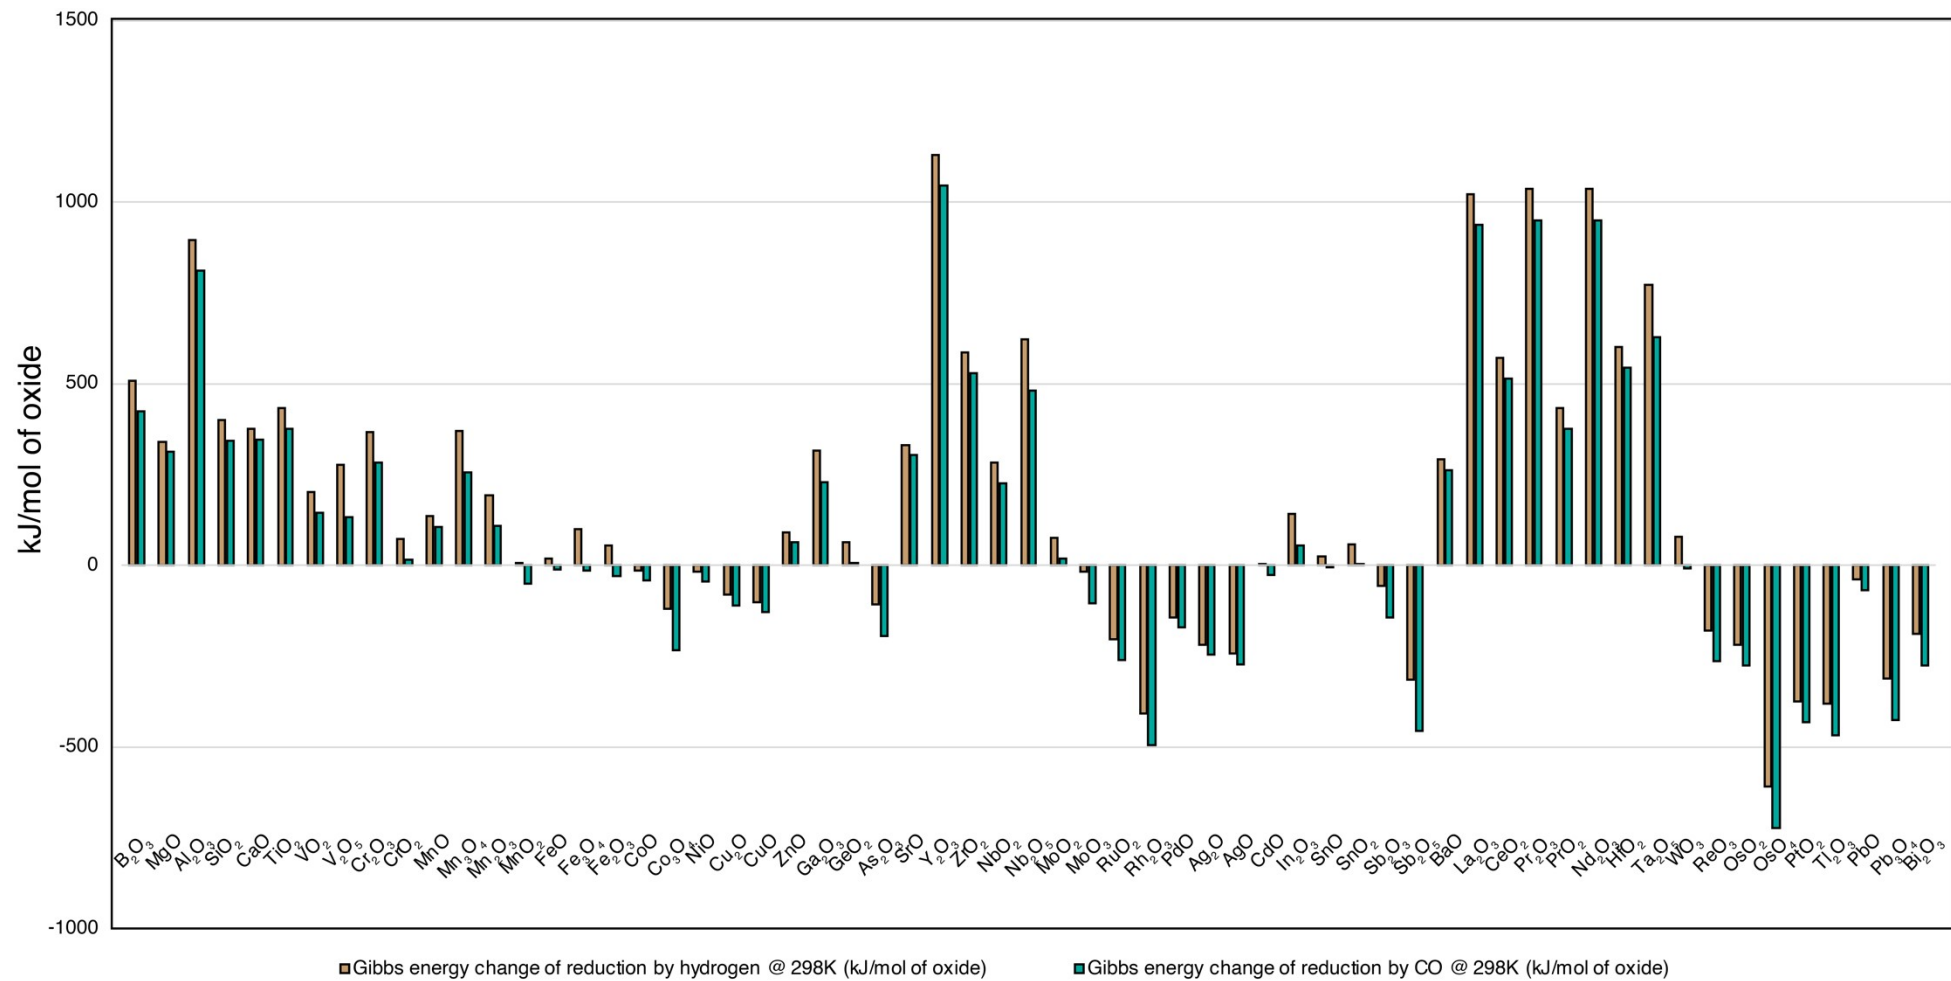

Figure S2. Hydrogen and CO reduction reaction Gibbs energy change in kJ/mol of oxide.

**Table S1.** Energies of formation for several metal oxides calculated using HSC 5.11 software, and enthalpy of oxygen formation data from literature, indicated in the last column.

| Oxides                         | $\Delta H_f$ 298K (kJ/mol) | $\Delta G_f$ 298K (kJ/mol) | $\Delta G$ of reduction by $H_2$ 298K (kJ/mol of oxide) | $\Delta G$ of reduction by CO @ 298K (kJ/mol of oxide) | Enthalpy of oxygen vacancy formation (eV/vac) | Ref |
|--------------------------------|----------------------------|----------------------------|---------------------------------------------------------|--------------------------------------------------------|-----------------------------------------------|-----|
| B <sub>2</sub> O <sub>3</sub>  | -1273.5                    | -1194.325                  | 508.58                                                  | 422.773                                                |                                               |     |
| MgO                            | -601.6                     | -569.352                   | 340.771                                                 | 312.168                                                | 6                                             | 1   |
| Al <sub>2</sub> O <sub>3</sub> | -1675.692                  | -1582.274                  | 896.529                                                 | 810.722                                                | 7                                             | 2   |
| SiO <sub>2</sub>               | -910.857                   | -856.443                   | 399.279                                                 | 342.075                                                | 6.4                                           | 2   |
| CaO                            | -634.92                    | -603.297                   | 374.716                                                 | 346.113                                                | 6.3                                           | 1   |
| TiO <sub>2</sub>               | -944.747                   | -889.417                   | 432.254                                                 | 375.049                                                | 5.7                                           | 2   |
| VO <sub>2</sub>                | -944.747                   | -658.637                   | 201.474                                                 | 144.269                                                |                                               |     |
| V <sub>2</sub> O <sub>5</sub>  | -1551                      | -1418.576                  | 275.667                                                 | 132.656                                                | 4.7                                           | 1   |
| Cr <sub>2</sub> O <sub>3</sub> | -1134.701                  | -1053.111                  | 367.365                                                 | 281.558                                                | 4.11                                          | 3   |
| CrO <sub>2</sub>               | -581.576                   | -529.359                   | 72.195                                                  | 14.991                                                 | 3                                             | 4   |
| MnO                            | -385.221                   | -362.834                   | 134.253                                                 | 105.65                                                 |                                               |     |
| Mn <sub>3</sub> O <sub>4</sub> | -1387.799                  | -1283.042                  | 368.714                                                 | 254.305                                                | 4.9                                           | 1   |
| Mn <sub>2</sub> O <sub>3</sub> | -956.881                   | -878.853                   | 193.108                                                 | 107.301                                                |                                               |     |
| MnO <sub>2</sub>               | -520.029                   | -465.074                   | 7.911                                                   | -49.294                                                | 4.5                                           | 1   |
| FeO                            | -267.27                    | -245.724                   | 17.143                                                  | -11.46                                                 | 4.2                                           | 2   |
| Fe <sub>3</sub> O <sub>4</sub> | -1118.383                  | -1015.226                  | 100.899                                                 | -13.51                                                 |                                               |     |
| Fe <sub>2</sub> O <sub>3</sub> | -823                       | -741.044                   | 55.298                                                  | -30.509                                                | 4.38                                          | 5   |
| CoO                            | -237.944                   | -214.198                   | -14.384                                                 | -42.986                                                | 4.1                                           | 2   |
| Co <sub>3</sub> O <sub>4</sub> | -910.02                    | -794.901                   | -119.426                                                | -233.835                                               | 4.2                                           | 1   |
| NiO                            | -239.7                     | -211.585                   | -16.996                                                 | -45.599                                                | 3.8                                           | 1   |
| Cu <sub>2</sub> O              | -170.6                     | -147.844                   | -80.738                                                 | -109.34                                                | 3.8                                           | 1   |
| CuO                            | -155.8                     | -128.077                   | -100.505                                                | -129.107                                               | 3.3                                           | 1   |
| ZnO                            | -350.5                     | -320.374                   | 91.792                                                  | 63.19                                                  | 4.2                                           | 1   |
| Ga <sub>2</sub> O <sub>3</sub> | -1091                      | -1000.292                  | 314.546                                                 | 228.739                                                | 4.8                                           | 2   |
| GeO <sub>2</sub>               | -579.902                   | -521.307                   | 64.143                                                  | 6.938                                                  | 4.4                                           | 2   |
| As <sub>2</sub> O <sub>3</sub> | -654.796                   | -576.651                   | -109.094                                                | -194.901                                               |                                               |     |
| SrO                            | -591                       | -560.591                   | 332.009                                                 | 303.407                                                | 6.5                                           | 2   |
| Y <sub>2</sub> O <sub>3</sub>  | -1905                      | -1816.11                   | 1130.365                                                | 1044.558                                               | 6.7                                           | 2   |
| ZrO <sub>2</sub>               | -1100.3                    | -1042.477                  | 585.313                                                 | 528.109                                                | 6.8                                           | 2   |
| NbO <sub>2</sub>               | -794.96                    | -739.235                   | 282.072                                                 | 224.867                                                | 5.6                                           | 1   |
| Nb <sub>2</sub> O <sub>5</sub> | -1899.536                  | -1765.937                  | 623.028                                                 | 480.017                                                |                                               |     |
| MoO <sub>2</sub>               | -589.3                     | -533.487                   | 76.323                                                  | 19.119                                                 |                                               |     |
| MoO <sub>3</sub>               | -744.6                     | -667.491                   | -18.254                                                 | -104.061                                               | 2.48                                          | 6   |
| RuO <sub>2</sub>               | -305.014                   | -252.657                   | -204.507                                                | -261.711                                               |                                               |     |
| Rh <sub>2</sub> O <sub>3</sub> | -355.64                    | -276.761                   | -408.984                                                | -494.791                                               | 3.4                                           | 2   |
| PdO                            | -115.478                   | -85.22                     | -143.362                                                | -171.964                                               |                                               |     |
| Ag <sub>2</sub> O              | -31.13                     | -11.175                    | -217.406                                                | -246.009                                               |                                               |     |
| AgO                            | -11.585                    | 14.494                     | -243.076                                                | -271.678                                               |                                               |     |
| CdO                            | -258.99                    | -229.305                   | 0.723                                                   | -27.879                                                | 2.8                                           | 2   |
| In <sub>2</sub> O <sub>3</sub> | -923                       | -827.227                   | 141.482                                                 | 55.675                                                 | 3.7                                           | 2   |
| SnO                            | -280.709                   | -251.912                   | 23.33                                                   | -5.272                                                 | 4.1                                           | 1   |
| SnO <sub>2</sub>               | -577.631                   | -515.819                   | 58.655                                                  | 1.451                                                  | 4                                             | 2   |
| Sb <sub>2</sub> O <sub>3</sub> | -708.547                   | -628.384                   | -57.361                                                 | -143.168                                               | 3.45                                          | 6   |
| Sb <sub>2</sub> O <sub>5</sub> | -971.901                   | -829.143                   | -313.766                                                | -456.778                                               |                                               |     |
| BaO                            | -548                       | -520.25                    | 291.668                                                 | 263.066                                                | 5.9                                           | 2   |
| La <sub>2</sub> O <sub>3</sub> | -1795.5                    | -1707.788                  | 1022.042                                                | 936.236                                                | 6.69                                          | 6   |
| CeO <sub>2</sub>               | -1090.4                    | -1027.102                  | 569.938                                                 | 512.734                                                | 2.87                                          | 6   |
| Pr <sub>2</sub> O <sub>3</sub> | -1809.6                    | -1720.875                  | 1035.129                                                | 949.323                                                |                                               |     |
| PrO <sub>2</sub>               | -949.35                    | -889.968                   | 432.805                                                 | 375.6                                                  |                                               |     |
| Nd <sub>2</sub> O <sub>3</sub> | -1808.3                    | -1721.45                   | 1035.705                                                | 949.898                                                |                                               |     |
| HfO <sub>2</sub>               | -1115.6                    | -1059.158                  | 601.994                                                 | 544.789                                                | 7                                             | 2   |

|                                |          |           |          |          |      |   |
|--------------------------------|----------|-----------|----------|----------|------|---|
| Ta <sub>2</sub> O <sub>5</sub> | -2049    | -1913.645 | 770.736  | 627.725  |      |   |
| WO <sub>3</sub>                | -842.909 | -764.065  | 78.319   | -7.487   | 3.5  | 7 |
| ReO <sub>3</sub>               | -589.107 | -507.132  | -178.614 | -264.421 |      |   |
| OsO <sub>2</sub>               | -295     | -239.644  | -217.52  | -274.725 |      |   |
| OsO <sub>4</sub>               | -394.099 | -304.942  | -609.385 | -723.794 |      |   |
| PtO <sub>2</sub>               | -133.888 | -80.894   | -376.27  | -433.474 | 2.9  | 1 |
| Tl <sub>2</sub> O <sub>3</sub> | -387     | -304.614  | -381.131 | -466.938 |      |   |
| PbO                            | -218.062 | -188.641  | -39.941  | -68.543  | 3.76 | 6 |
| Pb <sub>3</sub> O <sub>4</sub> | -718.686 | -601.591  | -312.736 | -427.145 |      |   |
| Bi <sub>2</sub> O <sub>3</sub> | -578.01  | -497.097  | -188.648 | -274.455 | 3.12 | 6 |

---

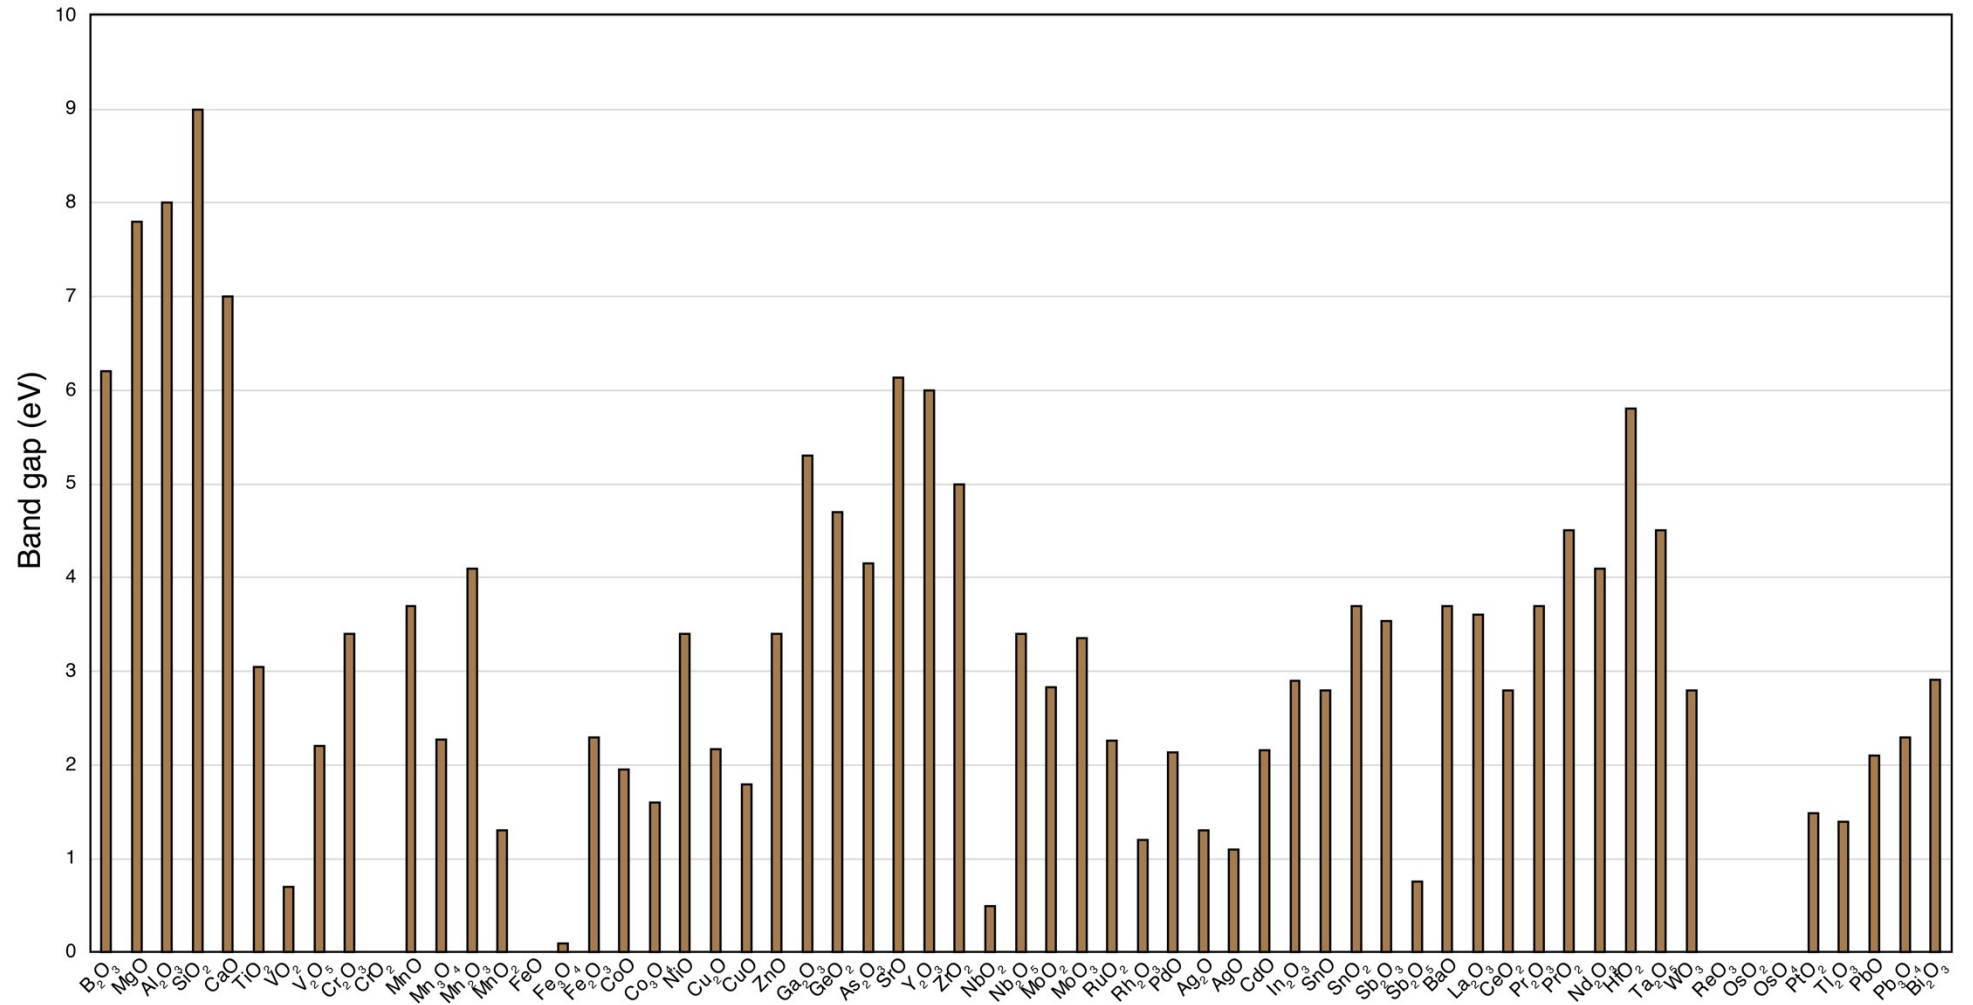

Figure S3. Bandgap values for selected binary metal oxides in eV.

**Table S2.** Reported band gaps for several metal oxides.

| Oxides                         | Band Gap (eV) | Ref  |
|--------------------------------|---------------|------|
| B <sub>2</sub> O <sub>3</sub>  | 6.2           | 8    |
| MgO                            | 7.8           | 9    |
| Al <sub>2</sub> O <sub>3</sub> | 8             | 10   |
| SiO <sub>2</sub>               | 9             | 11   |
| CaO                            | 7             | 12   |
| TiO <sub>2</sub>               | 3.05          | 13   |
| VO <sub>2</sub>                | 0.7           | 14   |
| V <sub>2</sub> O <sub>5</sub>  | 2.2           | 15   |
| Cr <sub>2</sub> O <sub>3</sub> | 3.4           | 16   |
| CrO <sub>2</sub>               | 0             | 17   |
| MnO                            | 3.7           | 18   |
| Mn <sub>3</sub> O <sub>4</sub> | 2.27          | 19   |
| Mn <sub>2</sub> O <sub>3</sub> | 4.1           | 18   |
| MnO <sub>2</sub>               | 1.3           | 18   |
| Fe <sub>3</sub> O <sub>4</sub> | 0.1           | 20   |
| Fe <sub>2</sub> O <sub>3</sub> | 2.3           | 21   |
| CoO                            | 1.95          | 22   |
| Co <sub>3</sub> O <sub>4</sub> | 1.6           | 23   |
| NiO                            | 3.4           | 24   |
| Cu <sub>2</sub> O              | 2.17          | 24   |
| CuO                            | 1.79          | 19   |
| ZnO                            | 3.4           | 24   |
| Ga <sub>2</sub> O <sub>3</sub> | 5.3           | 25   |
| GeO <sub>2</sub>               | 4.7           | 25   |
| As <sub>2</sub> O <sub>3</sub> | 4.15          | 26   |
| SrO                            | 6.14          | 27   |
| Y <sub>2</sub> O <sub>3</sub>  | 6             | 28   |
| ZrO <sub>2</sub>               | 5             | 21   |
| NbO <sub>2</sub>               | 0.5           | 29   |
| Nb <sub>2</sub> O <sub>5</sub> | 3.4           | 29   |
| MoO <sub>2</sub>               | 2.83          | 30   |
| MoO <sub>3</sub>               | 3.36          | 31   |
| RuO <sub>2</sub>               | 2.26          | 32   |
| Rh <sub>2</sub> O <sub>3</sub> | 1.2           | 33   |
| PdO                            | 2.13          | 34   |
| Ag <sub>2</sub> O              | 1.3           | 35   |
| AgO                            | 1.1           | 3535 |
| CdO                            | 2.16          | 3636 |
| In <sub>2</sub> O <sub>3</sub> | 2.9           | 24   |
| SnO                            | 2.8           | 24   |
| SnO <sub>2</sub>               | 3.7           | 25   |
| Sb <sub>2</sub> O <sub>3</sub> | 3.54          | 37   |
| Sb <sub>2</sub> O <sub>5</sub> | 0.76          | 37   |
| BaO                            | 3.7           | 38   |
| La <sub>2</sub> O <sub>3</sub> | 3.61          | 39   |
| CeO <sub>2</sub>               | 2.8           | 21   |
| Pr <sub>2</sub> O <sub>3</sub> | 3.7           | 40   |
| PrO <sub>2</sub>               | 4.5           | 40   |
| Nd <sub>2</sub> O <sub>3</sub> | 4.1           | 41   |
| HfO <sub>2</sub>               | 5.8           | 11   |
| Ta <sub>2</sub> O <sub>5</sub> | 4.5           | 4242 |
| WO <sub>3</sub>                | 2.8           | 21   |
| ReO <sub>3</sub>               | 0             | 43   |
| PtO <sub>2</sub>               | 1.49          | 44   |
| Tl <sub>2</sub> O <sub>3</sub> | 1.4           | 45   |

|                                |      |    |
|--------------------------------|------|----|
| PbO                            | 2.1  | 46 |
| Pb <sub>3</sub> O <sub>4</sub> | 2.3  | 46 |
| Bi <sub>2</sub> O <sub>3</sub> | 2.91 | 47 |

---



**Table S3.** A collection of relevant turnover frequencies (TOFs) values along with catalytic conditions for thermocatalytic CO<sub>2</sub> hydrogenation over different metal catalysts.

| Metal | MO                                    | WF M (eV) | CBM MO (eV) | $\Delta$ WF (eV) | new E <sub>F</sub> (eV) | E <sub>F</sub> - d-band center (eV) | E <sub>c</sub> (eV) | Loading (wt.%) | Reaction T (°C) | Metal Particle Size (nm) | TOF (mol CO <sub>2</sub> to products · s <sup>-1</sup> ) | Log (TOF) | Main Product       | R ef. |
|-------|---------------------------------------|-----------|-------------|------------------|-------------------------|-------------------------------------|---------------------|----------------|-----------------|--------------------------|----------------------------------------------------------|-----------|--------------------|-------|
| Rh    | Al <sub>2</sub> O <sub>3</sub>        | 4.98      | 2.28        | -2.7             | 4.98                    | 6.71                                | -1.73               | 1.00           | 150             | 3.60                     | 0.0009                                                   | -3.03621  | CH <sub>4</sub>    | 48    |
| Rh    | Al <sub>2</sub> O <sub>3</sub>        | 4.98      | 2.28        | -2.7             | 4.98                    | 6.71                                | -1.73               | 1.50           | 150             | 4.50                     | 0.0012                                                   | -2.9393   | CH <sub>4</sub>    | 48    |
| Rh    | Al <sub>2</sub> O <sub>3</sub>        | 4.98      | 2.28        | -2.7             | 4.98                    | 6.71                                | -1.73               | 2.00           | 150             | 6.10                     | 0.0023                                                   | -2.64207  | CH <sub>4</sub>    | 48    |
| Rh    | Al <sub>2</sub> O <sub>3</sub>        | 4.98      | 2.28        | -2.7             | 4.98                    | 6.71                                | -1.73               | 3.00           | 150             | 15.40                    | 0.0033                                                   | -2.47756  | CH <sub>4</sub>    | 48    |
| Rh    | Al <sub>2</sub> O <sub>3</sub>        | 4.98      | 2.28        | -2.7             | 4.98                    | 6.71                                | -1.73               | 5.00           | 150             | 15.10                    | 0.0020                                                   | -2.6925   | CH <sub>4</sub>    | 48    |
| Ni    | SiO <sub>2</sub>                      | 5.2       | 0.2         | -5               | 5.2                     | 6.49                                | -1.29               | 11.80          | 200             | 3.50                     | 0.0006                                                   | -3.19654  | CH <sub>4</sub>    | 49    |
| Ni    | SiO <sub>2</sub>                      | 5.2       | 0.2         | -5               | 5.2                     | 6.49                                | -1.29               | 6.70           | 200             | 2.50                     | 0.0007                                                   | -3.17005  | CH <sub>4</sub>    | 49    |
| Ni    | SiO <sub>2</sub>                      | 5.2       | 0.2         | -5               | 5.2                     | 6.49                                | -1.29               | 5.00           | 200             | 1.60                     | 0.0008                                                   | -3.10458  | CH <sub>4</sub>    | 49    |
| Ni    | SiO <sub>2</sub>                      | 5.2       | 0.2         | -5               | 5.2                     | 6.49                                | -1.29               | 19.50          | 200             | 5.00                     | 0.0014                                                   | -2.86012  | CH <sub>4</sub>    | 49    |
| Ni    | SiO <sub>2</sub>                      | 5.2       | 0.2         | -5               | 5.2                     | 6.49                                | -1.29               | 1.00           | 200             | 1.10                     | 0.0004                                                   | -3.45593  | CH <sub>4</sub>    | 49    |
| Ni    | SiO <sub>2</sub>                      | 5.2       | 0.2         | -5               | 5.2                     | 6.49                                | -1.29               | 60.00          | 200             | 6.90                     | 0.0037                                                   | -2.43415  | CH <sub>4</sub>    | 49    |
| Rh    | Al <sub>2</sub> O <sub>3</sub>        | 4.98      | 2.28        | -2.7             | 4.98                    | 6.71                                | -1.73               | 1.00           | 200             | 3.60                     | 0.0172                                                   | -1.76447  | CH <sub>4</sub>    | 48    |
| Rh    | Al <sub>2</sub> O <sub>3</sub>        | 4.98      | 2.28        | -2.7             | 4.98                    | 6.71                                | -1.73               | 1.50           | 200             | 4.50                     | 0.0124                                                   | -1.90658  | CH <sub>4</sub>    | 48    |
| Rh    | Al <sub>2</sub> O <sub>3</sub>        | 4.98      | 2.28        | -2.7             | 4.98                    | 6.71                                | -1.73               | 2.00           | 200             | 6.10                     | 0.0152                                                   | -1.81816  | CH <sub>4</sub>    | 48    |
| Rh    | Al <sub>2</sub> O <sub>3</sub>        | 4.98      | 2.28        | -2.7             | 4.98                    | 6.71                                | -1.73               | 3.00           | 200             | 15.40                    | 0.0188                                                   | -1.72584  | CH <sub>4</sub>    | 48    |
| Rh    | Al <sub>2</sub> O <sub>3</sub>        | 4.98      | 2.28        | -2.7             | 4.98                    | 6.71                                | -1.73               | 5.00           | 200             | 15.10                    | 0.0119                                                   | -1.92445  | CH <sub>4</sub>    | 48    |
| Ni    | Al <sub>2</sub> O <sub>3</sub>        | 5.2       | 2.28        | -2.92            | 5.2                     | 6.49                                | -1.29               | 20.00          | 220             | 14.30                    | 0.0005                                                   | -3.30103  | CH <sub>4</sub>    | 50    |
| Ni    | H-Al <sub>2</sub> O <sub>3</sub> -500 | 5.2       | 2.28        | -2.92            | 5.2                     | 6.49                                | -1.29               | 20.00          | 220             | 6.80                     | 0.0012                                                   | -2.92082  | CH <sub>4</sub>    | 50    |
| Ni    | H-Al <sub>2</sub> O <sub>3</sub> -400 | 5.2       | 2.28        | -2.92            | 5.2                     | 6.49                                | -1.29               | 20.00          | 220             | 4.60                     | 0.0024                                                   | -2.61979  | CH <sub>4</sub>    | 50    |
| Cu    | SiO <sub>2</sub>                      | 4.75      | 0.2         | -4.55            | 4.75                    | 7.42                                | -2.67               | 3.70           | 230             | 2.10                     | 0.0006                                                   | -3.25964  | CH <sub>3</sub> OH | 51    |
| Ni    | Al <sub>2</sub> O <sub>3</sub>        | 5.2       | 2.28        | -2.92            | 5.2                     | 6.49                                | -1.29               | 10.00          | 250             | 3.70                     | 0.0800                                                   | -1.09691  | CH <sub>4</sub>    | 52    |
| Ni    | ZSM-5                                 | 5.2       | 2.28        | -2.92            | 5.2                     | 6.49                                | -1.29               | 10.00          | 250             | 14.30                    | 0.0076                                                   | -2.1209   | CH <sub>4</sub>    | 53    |
| Ni    | SBA-15                                | 5.2       | 0.2         | -5               | 5.2                     | 6.49                                | -1.29               | 10.00          | 250             | 19.50                    | 0.0059                                                   | -2.22768  | CH <sub>4</sub>    | 53    |

|    |                                |      |      |       |      |      |       |       |     |       |        |          |                    |    |
|----|--------------------------------|------|------|-------|------|------|-------|-------|-----|-------|--------|----------|--------------------|----|
| Ni | MCM-41                         | 5.2  | 0.2  | -5    | 5.2  | 6.49 | -1.29 | 10.00 | 250 | 30.30 | 0.0034 | -2.46597 | CH <sub>4</sub>    | 53 |
| Co | SiO <sub>2</sub>               | 5    | 0.2  | -4.8  | 5    | 6.17 | -1.17 | 10.00 | 250 | 10.00 | 0.0070 | -2.1549  | CO/CH <sub>4</sub> | 54 |
| Ni | SiO <sub>2</sub>               | 5.2  | 0.2  | -5    | 5.2  | 6.49 | -1.29 | 11.80 | 300 | 3.50  | 0.0201 | -1.6968  | CH <sub>4</sub>    | 49 |
| Ni | SiO <sub>2</sub>               | 5.2  | 0.2  | -5    | 5.2  | 6.49 | -1.29 | 6.70  | 300 | 2.50  | 0.0259 | -1.5867  | CH <sub>4</sub>    | 49 |
| Ni | SiO <sub>2</sub>               | 5.2  | 0.2  | -5    | 5.2  | 6.49 | -1.29 | 5.00  | 300 | 1.60  | 0.0245 | -1.61083 | CH <sub>4</sub>    | 49 |
| Ni | SiO <sub>2</sub>               | 5.2  | 0.2  | -5    | 5.2  | 6.49 | -1.29 | 19.50 | 300 | 5.00  | 0.0404 | -1.39362 | CH <sub>4</sub>    | 49 |
| Ni | SiO <sub>2</sub>               | 5.2  | 0.2  | -5    | 5.2  | 6.49 | -1.29 | 1.00  | 300 | 1.10  | 0.0154 | -1.81248 | CH <sub>4</sub>    | 49 |
| Ni | SiO <sub>2</sub>               | 5.2  | 0.2  | -5    | 5.2  | 6.49 | -1.29 | 60.00 | 300 | 6.90  | 0.0403 | -1.39469 | CH <sub>4</sub>    | 49 |
| Ni | Al <sub>2</sub> O <sub>3</sub> | 5.2  | 2.28 | -2.92 | 5.2  | 6.49 | -1.29 | 10.00 | 300 | 3.70  | 0.0800 | -1.09691 | CH <sub>4</sub>    | 52 |
| Ni | Al-c                           | 5.2  | 2.28 | -2.92 | 5.2  | 6.49 | -1.29 | 15.00 | 300 | 5.10  | 0.0413 | -1.38405 | CH <sub>4</sub>    | 55 |
| Ni | Al-p                           | 5.2  | 2.28 | -2.92 | 5.2  | 6.49 | -1.29 | 15.00 | 300 | 5.60  | 0.0970 | -1.01323 | CH <sub>4</sub>    | 55 |
| Co | Al <sub>2</sub> O <sub>3</sub> | 5    | 2.28 | -2.72 | 5    | 6.17 | -1.17 | 1.00  | 300 | 10.00 | 0.0105 | -1.97881 | CO/CH <sub>4</sub> | 56 |
| Pt | SiO <sub>2</sub>               | 5.4  | 0.2  | -5.2  | 5.4  | 7.65 | -2.25 | 1.67  | 300 | 2.00  | 0.5800 | -0.23657 | CO                 | 57 |
| Ru | Al <sub>2</sub> O <sub>3</sub> | 4.71 | 2.28 | -2.43 | 4.71 | 5.85 | -1.14 | 5.00  | 300 | 7.10  | 0.3800 | -0.42022 | CH <sub>4</sub>    | 58 |
| Pt | SiO <sub>2</sub>               | 5.4  | 0.2  | -5.2  | 5.4  | 7.65 | -2.25 | 1.67  | 310 | 2.00  | 0.7400 | -0.13077 | CO                 | 57 |
| Pt | SiO <sub>2</sub>               | 5.4  | 0.2  | -5.2  | 5.4  | 7.65 | -2.25 | 1.67  | 320 | 2.00  | 0.9100 | -0.04096 | CO                 | 57 |
| Co | Al <sub>2</sub> O <sub>3</sub> | 5    | 2.28 | -2.72 | 5    | 6.17 | -1.17 | 1.00  | 325 | 10.00 | 0.0212 | -1.67366 | CO/CH <sub>4</sub> | 56 |
| Pt | SiO <sub>2</sub>               | 5.4  | 0.2  | -5.2  | 5.4  | 7.65 | -2.25 | 1.67  | 330 | 2.00  | 1.1000 | 0.041393 | CO                 | 57 |
| Pt | SiO <sub>2</sub>               | 5.4  | 0.2  | -5.2  | 5.4  | 7.65 | -2.25 | 1.67  | 340 | 2.00  | 1.3200 | 0.120574 | CO                 | 56 |
| Co | Al <sub>2</sub> O <sub>3</sub> | 5    | 2.28 | -2.72 | 5    | 6.17 | -1.17 | 1.00  | 350 | 10.00 | 0.0300 | -1.52288 | CO/CH <sub>4</sub> | 56 |
| Pt | SiO <sub>2</sub>               | 5.4  | 0.2  | -5.2  | 5.4  | 7.65 | -2.25 | 1.67  | 350 | 2.00  | 1.5500 | 0.190332 | CO                 | 57 |
| Rh | TiO <sub>2</sub>               | 4.98 | 7.52 | 2.54  | 6.25 | 7.98 | -1.73 | 0.50  | 135 | 2.00  | 0.0006 | -3.18842 | CH <sub>4</sub>    | 59 |
| Rh | TiO <sub>2</sub>               | 4.98 | 7.52 | 2.54  | 6.25 | 7.98 | -1.73 | 0.80  | 135 | 4.00  | 0.0017 | -2.78252 | CH <sub>4</sub>    | 59 |
| Rh | TiO <sub>2</sub>               | 4.98 | 7.52 | 2.54  | 6.25 | 7.98 | -1.73 | 1.00  | 135 | 5.00  | 0.0020 | -2.6968  | CH <sub>4</sub>    | 59 |
| Rh | TiO <sub>2</sub>               | 4.98 | 7.52 | 2.54  | 6.25 | 7.98 | -1.73 | 2.00  | 135 | 7.00  | 0.0028 | -2.54821 | CH <sub>4</sub>    | 59 |
| Rh | TiO <sub>2</sub>               | 4.98 | 7.52 | 2.54  | 6.25 | 7.98 | -1.73 | 3.00  | 135 | 17.00 | 0.0053 | -2.27491 | CH <sub>4</sub>    | 59 |
| Rh | TiO <sub>2</sub>               | 4.98 | 7.52 | 2.54  | 6.25 | 7.98 | -1.73 | 5.00  | 135 | 19.00 | 0.0044 | -2.36051 | CH <sub>4</sub>    | 59 |
| Rh | TiO <sub>2</sub>               | 4.98 | 7.52 | 2.54  | 6.25 | 7.98 | -1.73 | 0.50  | 150 | 2.00  | 0.0002 | -3.6216  | CH <sub>4</sub>    | 59 |
| Rh | TiO <sub>2</sub>               | 4.98 | 7.52 | 2.54  | 6.25 | 7.98 | -1.73 | 0.80  | 150 | 4.00  | 0.0008 | -3.10403 | CH <sub>4</sub>    | 59 |
| Rh | TiO <sub>2</sub>               | 4.98 | 7.52 | 2.54  | 6.25 | 7.98 | -1.73 | 1.00  | 150 | 5.00  | 0.0010 | -2.99568 | CH <sub>4</sub>    | 59 |

|    |                         |      |      |      |       |      |       |       |     |       |        |          |                    |    |
|----|-------------------------|------|------|------|-------|------|-------|-------|-----|-------|--------|----------|--------------------|----|
| Rh | TiO <sub>2</sub>        | 4.98 | 7.52 | 2.54 | 6.25  | 7.98 | -1.73 | 2.00  | 150 | 7.00  | 0.0016 | -2.7986  | CH <sub>4</sub>    | 59 |
| Rh | TiO <sub>2</sub>        | 4.98 | 7.52 | 2.54 | 6.25  | 7.98 | -1.73 | 3.00  | 150 | 17.00 | 0.0033 | -2.4828  | CH <sub>4</sub>    | 59 |
| Rh | TiO <sub>2</sub>        | 4.98 | 7.52 | 2.54 | 6.25  | 7.98 | -1.73 | 5.00  | 150 | 19.00 | 0.0025 | -2.5986  | CH <sub>4</sub>    | 59 |
| Rh | TiO <sub>2</sub>        | 4.98 | 7.52 | 2.54 | 6.25  | 7.98 | -1.73 | 0.50  | 165 | 2.00  | 0.0001 | -4.0000  | CH <sub>4</sub>    | 59 |
| Rh | TiO <sub>2</sub>        | 4.98 | 7.52 | 2.54 | 6.25  | 7.98 | -1.73 | 0.80  | 165 | 4.00  | 0.0004 | -3.41341 | CH <sub>4</sub>    | 59 |
| Rh | TiO <sub>2</sub>        | 4.98 | 7.52 | 2.54 | 6.25  | 7.98 | -1.73 | 1.00  | 165 | 5.00  | 0.0006 | -3.24033 | CH <sub>4</sub>    | 59 |
| Rh | TiO <sub>2</sub>        | 4.98 | 7.52 | 2.54 | 6.25  | 7.98 | -1.73 | 2.00  | 165 | 7.00  | 0.0009 | -3.03245 | CH <sub>4</sub>    | 59 |
| Rh | TiO <sub>2</sub>        | 4.98 | 7.52 | 2.54 | 6.25  | 7.98 | -1.73 | 3.00  | 165 | 17.00 | 0.0018 | -2.73755 | CH <sub>4</sub>    | 59 |
| Rh | TiO <sub>2</sub>        | 4.98 | 7.52 | 2.54 | 6.25  | 7.98 | -1.73 | 5.00  | 165 | 19.00 | 0.0015 | -2.81816 | CH <sub>4</sub>    | 59 |
| Ni | TiO <sub>2</sub>        | 5.2  | 7.52 | 2.32 | 6.36  | 7.65 | -1.29 | 5.00  | 200 | 9.40  | 0.0042 | -2.37986 | CH <sub>4</sub>    | 60 |
| Ru | TiO <sub>2</sub>        | 4.71 | 7.52 | 2.81 | 6.115 | 7.26 | -1.14 | 0.50  | 200 | 2.10  | 0.0150 | -1.82391 | CH <sub>4</sub>    | 61 |
| Ru | TiO <sub>2</sub> -200   | 4.71 | 7.52 | 2.81 | 6.115 | 7.26 | -1.14 | 2.30  | 200 | 1.70  | 0.0420 | -1.37675 | CH <sub>4</sub>    | 62 |
| Ru | TiO <sub>2</sub> -300   | 4.71 | 7.52 | 2.81 | 6.115 | 7.26 | -1.14 | 2.30  | 200 | 2.20  | 0.0960 | -1.01773 | CH <sub>4</sub>    | 62 |
| Rh | TiO <sub>2</sub>        | 4.98 | 7.52 | 2.54 | 6.25  | 7.98 | -1.73 | 6.00  | 200 | 2.50  | 0.0095 | -2.02228 | CO/CH <sub>4</sub> | 63 |
| Rh | TiO <sub>2</sub>        | 4.98 | 7.52 | 2.54 | 6.25  | 7.98 | -1.73 | 0.50  | 200 | 0.94  | 0.0137 | -1.86328 | CO/CH <sub>4</sub> | 63 |
| Rh | TiO <sub>2</sub>        | 4.98 | 7.52 | 2.54 | 6.25  | 7.98 | -1.73 | 2.00  | 200 | 1.40  | 0.0178 | -1.74958 | CO/CH <sub>4</sub> | 63 |
| Rh | TiO <sub>2</sub>        | 4.98 | 7.52 | 2.54 | 6.25  | 7.98 | -1.73 | 3.00  | 200 | 2.10  | 0.0215 | -1.66756 | CO/CH <sub>4</sub> | 63 |
| Rh | TiO <sub>2</sub>        | 4.98 | 7.52 | 2.54 | 6.25  | 7.98 | -1.73 | 4.00  | 200 | 1.60  | 0.0191 | -1.71897 | CO/CH <sub>4</sub> | 63 |
| Rh | TiO <sub>2</sub>        | 4.98 | 7.52 | 2.54 | 6.25  | 7.98 | -1.73 | 6.00  | 200 | 2.50  | 0.0232 | -1.63451 | CO/CH <sub>4</sub> | 63 |
| Ni | TiO <sub>2</sub>        | 5.2  | 7.52 | 2.32 | 6.36  | 7.65 | -1.29 | 5.00  | 225 | 9.40  | 0.0056 | -2.25493 | CH <sub>4</sub>    | 60 |
| Ru | TiO <sub>2</sub>        | 4.71 | 7.52 | 2.81 | 6.115 | 7.26 | -1.14 | 0.50  | 225 | 2.10  | 0.0327 | -1.48545 | CH <sub>4</sub>    | 61 |
| Ru | TiO <sub>2</sub>        | 4.71 | 7.52 | 2.81 | 6.115 | 7.26 | -1.14 | 0.50  | 225 | 2.10  | 0.0368 | -1.43415 | CH <sub>4</sub>    | 61 |
| Cu | ZrO <sub>2</sub>        | 4.75 | 6.86 | 2.11 | 5.805 | 8.48 | -2.67 | 0.80  | 230 | 2.20  | 0.0016 | -2.79588 | CH <sub>3</sub> OH | 51 |
| Ni | ZrO <sub>2</sub> -P     | 5.2  | 6.86 | 1.66 | 6.03  | 7.32 | -1.29 | 8.70  | 235 | 9.30  | 0.0580 | -1.23657 | CH <sub>4</sub>    | 64 |
| Ni | ZrO <sub>2</sub> -C     | 5.2  | 6.86 | 1.66 | 6.03  | 7.32 | -1.29 | 10.00 | 235 | 16.00 | 0.0400 | -1.39794 | CH <sub>4</sub>    | 64 |
| Ni | TiO <sub>2</sub>        | 5.2  | 7.52 | 2.32 | 6.36  | 7.65 | -1.29 | 5.00  | 250 | 9.40  | 0.0106 | -1.97469 | CH <sub>4</sub>    | 60 |
| Co | TiO <sub>2</sub>        | 5    | 7.52 | 2.52 | 5     | 6.17 | -1.17 | 10.00 | 250 | 10.00 | 0.0200 | -1.69897 | CO/CH <sub>4</sub> | 54 |
| Cu | TiO <sub>2</sub> -X-500 | 4.75 | 7.52 | 2.77 | 6.135 | 8.81 | -2.67 | 5.90  | 250 | 5.50  | 0.0141 | -1.85078 | CH <sub>3</sub> OH | 65 |
| Cu | TiO <sub>2</sub>        | 4.75 | 7.52 | 2.77 | 6.135 | 8.81 | -2.67 | 5.90  | 250 | 5.00  | 0.0017 | -2.76955 | CH <sub>3</sub> OH | 65 |

|    |                         |      |      |      |       |      |       |       |     |       |        |          |                    |    |
|----|-------------------------|------|------|------|-------|------|-------|-------|-----|-------|--------|----------|--------------------|----|
| Ru | TiO <sub>2</sub>        | 4.71 | 7.52 | 2.81 | 6.115 | 7.26 | -1.14 | 0.50  | 250 | 2.10  | 0.0590 | -1.22915 | CH <sub>4</sub>    | 61 |
| Ru | TiO <sub>2</sub>        | 4.71 | 7.52 | 2.81 | 6.115 | 7.26 | -1.14 | 0.50  | 250 | 2.10  | 0.0657 | -1.18243 | CH <sub>4</sub>    | 61 |
| Cu | TiO <sub>2</sub> -X-500 | 4.75 | 7.52 | 2.77 | 6.135 | 8.81 | -2.67 | 5.90  | 300 | 5.50  | 0.0260 | -1.58503 | CH <sub>3</sub> OH | 65 |
| Cu | TiO <sub>2</sub>        | 4.75 | 7.52 | 2.77 | 6.135 | 8.81 | -2.67 | 5.90  | 300 | 5.00  | 0.0029 | -2.5376  | CH <sub>3</sub> OH | 65 |
| Pt | TiO <sub>2</sub>        | 5.4  | 7.52 | 2.12 | 6.46  | 8.71 | -2.25 | 1.67  | 300 | 1.00  | 2.7600 | 0.440909 | CO                 | 57 |
| Pt | TiO <sub>2</sub>        | 5.4  | 7.52 | 2.12 | 6.46  | 8.71 | -2.25 | 1.67  | 310 | 1.00  | 3.3100 | 0.519828 | CO                 | 57 |
| Fe | ZrO <sub>2</sub>        | 4.7  | 6.86 | 2.16 | 5.78  | 6.70 | -0.92 | 10.00 | 320 | 12.90 | 0.0450 | -1.34679 | CO/CH <sub>4</sub> | 66 |
| Fe | ZrO <sub>2</sub>        | 4.7  | 6.86 | 2.16 | 5.78  | 6.70 | -0.92 | 10.00 | 320 | 9.80  | 0.0200 | -1.69897 | CO/CH <sub>4</sub> | 66 |
| Fe | ZrO <sub>2</sub>        | 4.7  | 6.86 | 2.16 | 5.78  | 6.70 | -0.92 | 10.00 | 320 | 6.10  | 0.0090 | -2.04576 | CO/CH <sub>4</sub> | 66 |
| Fe | ZrO <sub>2</sub>        | 4.7  | 6.86 | 2.16 | 5.78  | 6.70 | -0.92 | 10.00 | 320 | 4.00  | 0.0060 | -2.22185 | CO/CH <sub>4</sub> | 66 |
| Fe | ZrO <sub>2</sub>        | 4.7  | 6.86 | 2.16 | 5.78  | 6.70 | -0.92 | 10.00 | 320 | 2.50  | 0.0040 | -2.39794 | CO/CH <sub>4</sub> | 66 |
| Fe | ZrO <sub>2</sub>        | 4.7  | 6.86 | 2.16 | 5.78  | 6.70 | -0.92 | 10.00 | 320 | 2.50  | 0.0001 | -3.85387 | CO/CH <sub>4</sub> | 66 |
| Fe | ZrO <sub>2</sub>        | 4.7  | 6.86 | 2.16 | 5.78  | 6.70 | -0.92 | 10.00 | 320 | 2.50  | 0.0001 | -3.85387 | CO/CH <sub>4</sub> | 66 |
| Fe | ZrO <sub>2</sub>        | 4.7  | 6.86 | 2.16 | 5.78  | 6.70 | -0.92 | 10.00 | 320 | 2.50  | 0.0001 | -3.85387 | CO/CH <sub>4</sub> | 66 |
| Pt | TiO <sub>2</sub>        | 5.4  | 7.52 | 2.12 | 6.46  | 8.71 | -2.25 | 1.67  | 320 | 1.00  | 3.9800 | 0.599883 | CO                 | 57 |
| Ru | TiO <sub>2</sub>        | 4.71 | 7.52 | 2.81 | 6.115 | 7.26 | -1.14 | 0.50  | 320 | 4.20  | 0.2580 | -0.58838 | CH <sub>4</sub>    | 61 |
| Cu | TiO <sub>2</sub> -X-500 | 4.75 | 7.52 | 2.77 | 6.135 | 8.81 | -2.67 | 5.90  | 325 | 5.50  | 0.0206 | -1.68613 | CH <sub>3</sub> OH | 65 |
| Cu | TiO <sub>2</sub>        | 4.75 | 7.52 | 2.77 | 6.135 | 8.81 | -2.67 | 5.90  | 325 | 5.00  | 0.0023 | -2.63827 | CH <sub>3</sub> OH | 65 |
| Pt | TiO <sub>2</sub>        | 5.4  | 7.52 | 2.12 | 6.46  | 8.71 | -2.25 | 1.67  | 330 | 1.00  | 4.6700 | 0.669317 | CO                 | 57 |
| Pt | TiO <sub>2</sub>        | 5.4  | 7.52 | 2.12 | 6.46  | 8.71 | -2.25 | 1.67  | 340 | 1.00  | 5.4500 | 0.736397 | CO                 | 57 |
| Pt | TiO <sub>2</sub>        | 5.4  | 7.52 | 2.12 | 6.46  | 8.71 | -2.25 | 1.67  | 350 | 1.00  | 6.2600 | 0.796574 | CO                 | 57 |
| Pt | TiO <sub>2</sub>        | 5.4  | 7.52 | 2.12 | 6.46  | 8.71 | -2.25 | 0.50  | 350 | 1.70  | 0.0855 | -1.06803 | CO                 | 67 |
| Pt | TiO <sub>2</sub>        | 5.4  | 7.52 | 2.12 | 6.46  | 8.71 | -2.25 | 0.50  | 350 | 2.25  | 0.0825 | -1.08355 | CO                 | 67 |
| Pt | TiO <sub>2</sub>        | 5.4  | 7.52 | 2.12 | 6.46  | 8.71 | -2.25 | 0.50  | 350 | 3.05  | 0.0920 | -1.03621 | CO                 | 67 |
| Pt | TiO <sub>2</sub>        | 5.4  | 7.52 | 2.12 | 6.46  | 8.71 | -2.25 | 0.50  | 350 | 1.50  | 0.1050 | -0.97881 | CO                 | 67 |
| Ru | TiO <sub>2</sub>        | 4.71 | 7.52 | 2.81 | 6.115 | 7.26 | -1.14 | 0.50  | 350 | 4.20  | 0.4260 | -0.37059 | CH <sub>4</sub>    | 61 |
| Ir | TiO <sub>2</sub>        | 5.3  | 7.52 | 2.22 | 6.41  | 8.52 | -2.11 | 0.50  | 350 | 1.50  | 0.0220 | -1.65758 | CO                 | 68 |
| Ir | TiO <sub>2</sub>        | 5.3  | 7.52 | 2.22 | 6.41  | 8.52 | -2.11 | 1.00  | 350 | 1.10  | 0.0150 | -1.82391 | CO                 | 68 |
| Ir | TiO <sub>2</sub>        | 5.3  | 7.52 | 2.22 | 6.41  | 8.52 | -2.11 | 5.00  | 350 | 2.00  | 0.0013 | -2.88606 | CO/CH <sub>4</sub> | 68 |

## References

- (1) Wan, Z.; Wang, Q.-D.; Liu, D.; Liang, J. Data-driven machine learning model for the prediction of oxygen vacancy formation energy of metal oxide materials. *Phys. Chem. Chem. Phys.* **2021**, *23*, 15675-15684.
- (2) Deml, A. M.; Holder, A. M.; O'Hayre, R. P.; Musgrave, C. B.; Stevanović, V. Intrinsic Material Properties Dictating Oxygen Vacancy Formation Energetics in Metal Oxides. *J. Phys. Chem. Lett.* **2015**, *6*, 1948-1953.
- (3) Carey, J. J.; Legesse, M.; Nolan, M. Low Valence Cation Doping of Bulk Cr<sub>2</sub>O<sub>3</sub>: Charge Compensation and Oxygen Vacancy Formation. *J. Phys. Chem. C* **2016**, *120*, 19160-19174.
- (4) Liu, S.; Lu, Z.; Yuan, C.; Guo, F.; Xiong, R.; Shi, J. Oxygen Vacancies in CrO<sub>2</sub>: The Influences to Half Metallicity and the Formation Mode. *IEEE Trans. Magn.* **2016**, *52*, 1-8.
- (5) Zhang, M.; Duan, X.; Gao, Y.; Zhang, S.; Lu, X.; Luo, K.; Ye, J.; Wang, X.; Niu, Q.; Zhang, P. Tuning Oxygen Vacancies in Oxides by Configurational Entropy. *ACS Appl. Mater. Interfaces* **2023**, *15*, 45774-45789.
- (6) Hinuma, Y.; Toyao, T.; Kamachi, T.; Maeno, Z.; Takakusagi, S.; Furukawa, S.; Takigawa, I.; Shimizu, K.-i. Density Functional Theory Calculations of Oxygen Vacancy Formation and Subsequent Molecular Adsorption on Oxide Surfaces. *J. Phys. Chem. C* **2018**, *122*, 29435-29444.
- (7) Chatten, R.; Chadwick, A. V.; Rougier, A.; Lindan, P. J. The oxygen vacancy in crystal phases of WO<sub>3</sub>. *J. Phys. Chem. B* **2005**, *109*, 3146-3156.
- (8) Li, D.; Ching, W. Electronic structures and optical properties of low-and high-pressure phases of crystalline B<sub>2</sub>O<sub>3</sub>. *Phys. Rev. B* **1996**, *54*, 13616.
- (9) Patel, M. K.; Ali, M. A.; Krishnan, S.; Agrawal, V. V.; Al Kheraif, A. A.; Fouad, H.; Ansari, Z.; Ansari, S.; Malhotra, B. D. A label-free photoluminescence genosensor using nanostructured magnesium oxide for cholera detection. *Sci. Rep.* **2015**, *5*, 17384.
- (10) Chen, Y.; Bovet, N.; Trier, F.; Christensen, D.; Qu, F.; Andersen, N. H.; Kasama, T.; Zhang, W.; Giraud, R.; Dufouleur, J. A high-mobility two-dimensional electron gas at the spinel/perovskite interface of  $\gamma$ -Al<sub>2</sub>O<sub>3</sub>/SrTiO<sub>3</sub>. *Nat. Commun.* **2013**, *4*, 1371.
- (11) Illarionov, Y. Y.; Knobloch, T.; Jech, M.; Lanza, M.; Akinwande, D.; Vexler, M. I.; Mueller, T.; Lemme, M. C.; Fiori, G.; Schwierz, F. Insulators for 2D nanoelectronics: the gap to bridge. *Nat. Commun.* **2020**, *11*, 3385.
- (12) Whited, R.; Flaten, C. J.; Walker, W. Exciton thermoreflectance of MgO and CaO. *Solid State Commun.* **1973**, *13*, 1903-1905.
- (13) Carp, O.; Huisman, C. L.; Reller, A. Photoinduced reactivity of titanium dioxide. *Prog. Solid State Chem.* **2004**, *32*, 33-177.
- (14) Hu, P.; Hu, P.; Vu, T. D.; Li, M.; Wang, S.; Ke, Y.; Zeng, X.; Mai, L.; Long, Y. Vanadium Oxide: Phase Diagrams, Structures, Synthesis, and Applications. *Chem. Rev.* **2023**, *123*, 4353-4415.
- (15) Broomhead, W. T.; Tian, W.; Herrera, J. E.; Chin, Y.-H. C. Kinetic Coupling of Redox and Acid Chemistry in Methanol Partial Oxidation on Vanadium Oxide Catalysts. *ACS Catal.* **2022**, *12*, 11801-11820.
- (16) Ding, C.; Ma, Y.; Lai, X.; Yang, Q.; Xue, P.; Hu, F.; Geng, W. Ordered large-pore mesoporous Cr<sub>2</sub>O<sub>3</sub> with ultrathin framework for formaldehyde sensing. *ACS Appl. Mater. Interfaces* **2017**, *9*, 18170-18177.
- (17) Dwivedi, S.; Biswas, S. Enhanced room-temperature magnetoresistance in self-assembled Ag-coated multiphase chromium oxide nanocomposites. *Phys. Chem. Chem. Phys.* **2016**, *18*, 23879-23887.
- (18) Ghosh, S. K. Diversity in the family of manganese oxides at the nanoscale: from fundamentals to applications. *ACS omega* **2020**, *5*, 25493-25504.
- (19) Gupta, S. V.; Kulkarni, V. V.; Ahmaruzzaman, M. Bandgap engineering approach for designing CuO/Mn<sub>3</sub>O<sub>4</sub>/CeO<sub>2</sub> heterojunction as a novel photocatalyst for AOP-assisted degradation of Malachite green dye. *Sci. Rep.* **2023**, *13*, 3009.
- (20) Ashraf, M.; Khan, I.; Usman, M.; Khan, A.; Shah, S. S.; Khan, A. Z.; Saeed, K.; Yaseen, M.; Ehsan, M. F.; Tahir, M. N. Hematite and magnetite nanostructures for green and sustainable energy harnessing and environmental pollution control: a review. *Chem. Res. Toxicol.* **2019**, *33*, 1292-1311.
- (21) Medhi, R.; Marquez, M. D.; Lee, T. R. Visible-light-active doped metal oxide nanoparticles: review of their synthesis, properties, and applications. *ACS Appl. Nano Mater.* **2020**, *3*, 6156-6185.
- (22) Moridon, S. N. F.; Salehmin, M. I.; Mohamed, M. A.; Arifin, K.; Minggu, L. J.; Kassim, M. B. Cobalt oxide as photocatalyst for water splitting: Temperature-dependent phase structures. *Int. J. Hydrog. Energy* **2019**, *44*, 25495-25504.
- (23) Chen, J.; Wu, X.; Selloni, A. Electronic structure and bonding properties of cobalt oxide in the spinel structure. *Phys. Rev. B* **2011**, *83*, 245204.
- (24) Shi, J.; Zhang, J.; Yang, L.; Qu, M.; Qi, D. C.; Zhang, K. H. Wide bandgap oxide semiconductors: from materials physics to optoelectronic devices. *Adv. Mater.* **2021**, *33*, 2006230.

- (25) Wong, M. H.; Bierwagen, O.; Kaplar, R. J.; Umezawa, H. Ultrawide-bandgap semiconductors: An overview. *J. Mater. Res.* **2021**, *36*, 4601-4615.
- (26) Dhaka, R.; Yadav, A.; Goyal, A.; Pandey, A.; Gupta, G.; Dutta, S.; Shukla, A. Structural and Optical Properties of Arsenic-Oxide Microcrystals on Gaas Substrate for Photonic Applications. Available at SSRN 4512709. Dhaka, Rangeeta and Yadav, Aditya and Goyal, Anshu and Pandey, Akhilesh and Gupta, Govind and Dutta, Shankar and Shukla, A. K., Structural and Optical Properties of Arsenic-Oxide Microcrystals on Gaas Substrate for Photonic Applications. Available at SSRN: <http://dx.doi.org/10.2139/ssrn.4512709>
- (27) Nemade, K.; Waghuley, S. UV-VIS spectroscopic study of one pot synthesized strontium oxide quantum dots. *Results Phys.* **2013**, *3*, 52-54.
- (28) Tropf, W. J.; Thomas, M. E. *Yttrium oxide (Y<sub>2</sub>O<sub>3</sub>)* In *Handbook of optical constants of solids*; Elsevier, Amsterdam, 1997.
- (29) Nico, C.; Monteiro, T.; Graça, M. P. Niobium oxides and niobates physical properties: Review and prospects. *Prog. Mater. Sci.* **2016**, *80*, 1-37.
- (30) Patil, R.; Uplane, M.; Patil, P. Structural and optical properties of electrodeposited molybdenum oxide thin films. *Appl. Surf. Sci.* **2006**, *252*, 8050-8056.
- (31) Kumar, A.; Pandey, G. Synthesis, characterization, effect of temperature on band gap energy of molybdenum oxide nano rods and their antibacterial activity. *Am. J. Appl. Ind. Chem.* **2017**, *3*, 38-42.
- (32) Vijayabala, V.; Senthilkumar, N.; Nehru, K.; Karvembu, R. Hydrothermal synthesis and characterization of ruthenium oxide nanosheets using polymer additive for supercapacitor applications. *J. Mater. Sci.: Mater. Electron.* **2018**, *29*, 323-330.
- (33) Scherson, Y. D.; Aboud, S. J.; Wilcox, J.; Cantwell, B. J. Surface structure and reactivity of rhodium oxide. *J. Phys. Chem. C* **2011**, *115*, 11036-11044.
- (34) Rey, E.; Kamal, M.; Miles, R.; Royce, B. The semiconductivity and stability of palladium oxide. *J. Mater. Sci.* **1978**, *13*, 812-816.
- (35) Allen, J. P.; Scanlon, D. O.; Watson, G. W. Electronic structures of silver oxides. *Phys. Rev. B* **2011**, *84*, 115141.
- (36) Jefferson, P. H.; Hatfield, S.; Veal, T. D.; King, P.; McConville, C. F.; Zúñiga-Pérez, J.; Muñoz-Sanjosé, V. Bandgap and effective mass of epitaxial cadmium oxide. *Appl. Phys. Lett.* **2008**, *92*.
- (37) Allen, J. P.; Carey, J. J.; Walsh, A.; Scanlon, D. O.; Watson, G. W. Electronic structures of antimony oxides. *J. Phys. Chem. C* **2013**, *117*, 14759-14769.
- (38) Sundharam, E.; Jeevaraj, A.; Chinnusamy, C. Effect of ultrasonication on the synthesis of barium oxide nanoparticles. *J. Bionanosci.* **2017**, *11*, 310-314.
- (39) Gu, W.; Song, Y.; Liu, J.; Wang, F. Lanthanum-Based Compounds: Electronic Band-Gap-Dependent Electrocatalytic Materials for Oxygen Reduction Reaction. *Chem. Eur. J.* **2017**, *23*, 10126-10132.
- (40) Seifarth, O.; Dabrowski, J.; Zaumseil, P.; Müller, S.; Schmeißer, D.; Müssig, H.-J.; Schroeder, T. On the band gaps and electronic structure of thin single crystalline praseodymium oxide layers on Si (111). *J. Vac. Sci. Technol. B: Nanotechnol. Microelectron.* **2009**, *27*, 271-276.
- (41) Pourmortazavi, S. M.; Rahimi-Nasrabadi, M.; Aghazadeh, M.; Ganjali, M. R.; Karimi, M. S.; Norouzi, P. Synthesis, characterization and photocatalytic activity of neodymium carbonate and neodymium oxide nanoparticles. *J. Mol. Struct.* **2017**, *1150*, 411-418.
- (42) Kukli, K.; Aarik, J.; Aidla, A.; Kohan, O.; Uustare, T.; Sammelselg, V. Properties of tantalum oxide thin films grown by atomic layer deposition. *Thin Solid Films* **1995**, *260*, 135-142.
- (43) Hahn, B. P.; May, R. A.; Stevenson, K. J. Electrochemical deposition and characterization of mixed-valent rhenium oxide films prepared from a perrhenate solution. *Langmuir* **2007**, *23*, 10837-10845.
- (44) Seriani, N.; Jin, Z.; Pompe, W.; Ciacchi, L. C. Density functional theory study of platinum oxides: From infinite crystals to nanoscopic particles. *Phys. Rev. B* **2007**, *76*, 155421.
- (45) Moeinian, M.; Akhbari, K. Various methods for synthesis of bulk and nano thallium (III) oxide. *J. Inorg. Organomet. Polym. Mater.* **2016**, *26*, 1-13.
- (46) Zhuravlev, Y. N.; Korabel'nikov, D. V. e. A first principles study of the mechanical, electronic, and vibrational properties of lead oxide. *Phys. Solid State* **2017**, *59*, 2296-2311.
- (47) Ho, C.-H.; Chan, C.-H.; Huang, Y.-S.; Tien, L.-C.; Chao, L.-C. The study of optical band edge property of bismuth oxide nanowires  $\alpha$ -Bi<sub>2</sub>O<sub>3</sub>. *Opt. Express* **2013**, *21*, 11965-11972.
- (48) Karelavic, A.; Ruiz, P. CO<sub>2</sub> hydrogenation at low temperature over Rh/ $\gamma$ -Al<sub>2</sub>O<sub>3</sub> catalysts: Effect of the metal particle size on catalytic performances and reaction mechanism. *Appl. Catal. B: Environ.* **2012**, *113-114*, 237-249.
- (49) Vogt, C.; Groeneveld, E.; Kamsma, G.; Nachtegaal, M.; Lu, L.; Kiely, C. J.; Berben, P. H.; Meirer, F.; Weckhuysen, B. M. Unravelling structure sensitivity in CO<sub>2</sub> hydrogenation over nickel. *Nat. Catal.* **2018**, *1*, 127-134.
- (50) He, S.; Li, C.; Chen, H.; Su, D.; Zhang, B.; Cao, X.; Wang, B.; Wei, M.; Evans, D. G.; Duan, X. A surface defect-promoted Ni nanocatalyst with simultaneously enhanced activity and stability. *Chemistry of Materials* **2013**, *25*, 1040-1046.
- (51) Larmier, K.; Liao, W.-C.; Tada, S.; Lam, E.; Verel, R.; Bansode, A.; Urakawa, A.; Comas-Vives, A.; Copéret, C. CO<sub>2</sub>-to-Methanol Hydrogenation on Zirconia-Supported Copper Nanoparticles: Reaction

- Intermediates and the Role of the Metal–Support Interface. *Angew. Chem. Int. Ed.* **2017**, *56*, 2318-2323.
- (52) Mutz, B.; Gänzler, A. M.; Nachtegaal, M.; Müller, O.; Frahm, R.; Kleist, W.; Grunwaldt, J.-D. Surface oxidation of supported Ni particles and its impact on the catalytic performance during dynamically operated methanation of CO<sub>2</sub>. *Catalysts* **2017**, *7*, 279.
- (53) Guo, X.; Traitangwong, A.; Hu, M.; Zuo, C.; Meeyoo, V.; Peng, Z.; Li, C. Carbon dioxide methanation over nickel-based catalysts supported on various mesoporous material. *Energy & Fuels* **2018**, *32*, 3681-3689.
- (54) Melaet, G. r. m.; Ralston, W. T.; Li, C.-S.; Alayoglu, S.; An, K.; Musselwhite, N.; Kalkan, B.; Somorjai, G. A. Evidence of highly active cobalt oxide catalyst for the Fischer–Tropsch synthesis and CO<sub>2</sub> hydrogenation. *J. Am. Chem. Soc.* **2014**, *136*, 2260-2263.
- (55) Bian, L.; Zhang, L.; Xia, R.; Li, Z. Enhanced low-temperature CO<sub>2</sub> methanation activity on plasma-prepared Ni-based catalyst. *J. Nat. Gas Eng.* **2015**, *27*, 1189-1194.
- (56) Shin, H. H.; Lu, L.; Yang, Z.; Kiely, C. J.; McIntosh, S. Cobalt catalysts decorated with platinum atoms supported on barium zirconate provide enhanced activity and selectivity for CO<sub>2</sub> methanation. *ACS Catal.* **2016**, *6*, 2811-2818.
- (57) Kattel, S.; Yan, B.; Chen, J. G.; Liu, P. CO<sub>2</sub> hydrogenation on Pt, Pt/SiO<sub>2</sub> and Pt/TiO<sub>2</sub>: Importance of synergy between Pt and oxide support. *J. Catal.* **2016**, *343*, 115-126.
- (58) Dreyer, J. A. H.; Li, P.; Zhang, L.; Beh, G. K.; Zhang, R.; Sit, P. H. L.; Teoh, W. Y. Influence of the oxide support reducibility on the CO<sub>2</sub> methanation over Ru-based catalysts. *Appl. Catal. B: Environ.* **2017**, *219*, 715-726.
- (59) Karelovic, A.; Ruiz, P. Mechanistic study of low temperature CO<sub>2</sub> methanation over Rh/TiO<sub>2</sub> catalysts. *J. Catal.* **2013**, *301*, 141-153.
- (60) Li, M.; Amari, H.; van Veen, A. C. Metal-oxide interaction enhanced CO<sub>2</sub> activation in methanation over ceria supported nickel nanocrystallites. *Appl. Catal. B: Environ.* **2018**, *239*, 27-35.
- (61) Panagiotopoulou, P. Methanation of CO<sub>2</sub> over alkali-promoted Ru/TiO<sub>2</sub> catalysts: II. Effect of alkali additives on the reaction pathway. *Appl. Catal. B: Environ.* **2018**, *236*, 162-170.
- (62) Zhang, Y.; Yan, W.; Qi, H.; Su, X.; Su, Y.; Liu, X.; Li, L.; Yang, X.; Huang, Y.; Zhang, T. Strong Metal–Support Interaction of Ru on TiO<sub>2</sub> Derived from the Co-Reduction Mechanism of Ru x Ti<sub>1-x</sub>O<sub>2</sub> Interphase. *ACS Catal.* **2022**, *12*, 1697-1705.
- (63) Matsubu, J. C.; Yang, V. N.; Christopher, P. Isolated metal active site concentration and stability control catalytic CO<sub>2</sub> reduction selectivity. *J. Am. Chem. Soc.* **2015**, *137*, 3076-3084.
- (64) Jia, X.; Zhang, X.; Rui, N.; Hu, X.; Liu, C.-j. Structural effect of Ni/ZrO<sub>2</sub> catalyst on CO<sub>2</sub> methanation with enhanced activity. *Appl. Catal. B: Environ.* **2019**, *244*, 159-169.
- (65) Zhang, C.; Wang, L.; Etim, U. J.; Song, Y.; Gazit, O. M.; Zhong, Z. Oxygen vacancies in Cu/TiO<sub>2</sub> boost strong metal-support interaction and CO<sub>2</sub> hydrogenation to methanol. *J. Catal.* **2022**, *413*, 284-296.
- (66) Zhu, J.; Zhang, G.; Li, W.; Zhang, X.; Ding, F.; Song, C.; Guo, X. Deconvolution of the particle size effect on CO<sub>2</sub> hydrogenation over iron-based catalysts. *ACS Catal.* **2020**, *10*, 7424-7433.
- (67) Chen, Z.; Liang, L.; Yuan, H.; Liu, H.; Wu, P.; Fu, M.; Wu, J.; Chen, P.; Qiu, Y.; Ye, D. Reciprocal regulation between support defects and strong metal-support interactions for highly efficient reverse water gas shift reaction over Pt/TiO<sub>2</sub> nanosheets catalysts. *Appl. Catal. B: Environ.* **2021**, *298*, 120507.
- (68) Chen, X.; Su, X.; Su, H.-Y.; Liu, X.; Miao, S.; Zhao, Y.; Sun, K.; Huang, Y.; Zhang, T. Theoretical insights and the corresponding construction of supported metal catalysts for highly selective CO<sub>2</sub> to CO conversion. *ACS Catal.* **2017**, *7*, 4613-4620.
